# Supplementary material for: Simulators and Simulations for Extracorporeal Membrane Oxygenation: An ECMO Scoping Review
Source: MDPI journal article supplement (doi:10.3390/jcm12051765), 2023-02-22
Supplement: s1 [file s1]

**Table S2.** Definition-based fidelity (right column) is established by taking the median of the functional, physical, and psychological fidelity, classifying low-, mid-, or high-fidelity. The level of functional, physical, psychological fidelity are determined low (-), low and high (+/-), and high (+). Conceptual fidelity distinguishes if the device is computational (C), physical (P), or computational and physical (C+P).

| Source                                      | Device                        | Conceptual fidelity<br>(C, P, or C+P) | Functional fidelity<br>(- or +/- or +) | Physical fidelity<br>(- or +/- or +) | Psychological fidelity<br>(- or +/- or +) | Definition fidelity<br>(Low-Mid-High) |
|---------------------------------------------|-------------------------------|---------------------------------------|----------------------------------------|--------------------------------------|-------------------------------------------|---------------------------------------|
| 3-Dmed [1]                                  | ECMO Simulation Kit           | P                                     | -                                      | -                                    | -                                         | Low                                   |
| Allan, <i>et al.</i> [2]                    | Integrated Skills Trainer     | P                                     | +/-                                    | +                                    | +                                         | High                                  |
| Alhomsj, <i>et al.</i> [3]                  | Modular ECMO simulator        | C+P                                   | +/-                                    | -                                    | +/-                                       | Mid                                   |
| BioMed Simulations [4]                      | Califia Patient Simulator     | C                                     | +/-                                    | N/A                                  | -                                         | Low                                   |
| BioMed Simulations [5]                      | Califia Lung Simulator        | C                                     | +/-                                    | N/A                                  | -                                         | Low                                   |
| Broman, <i>et al.</i> [6]                   | Aplysia                       | C                                     | +/-                                    | N/A                                  | -                                         | Low                                   |
| Chalice [7]                                 | Parallel Simulator            | C                                     | +/-                                    | N/A                                  | +/-                                       | Mid                                   |
| Colasanti, <i>et al.</i> [8]                | Computational ECMO Simulator  | C                                     | +                                      | N/A                                  | +/-                                       | Mid                                   |
| Creaplast [9]                               | ECMO Trainer Evolution III    | C+P                                   | +/-                                    | +/-                                  | +/-                                       | Mid                                   |
| Curtis Life Research [10]                   | Eigenflow 2 ADVANCED          | C+P                                   | +                                      | +/-                                  | +                                         | High                                  |
| Endo, <i>et al.</i> [11]                    | Endo Circuit                  | P                                     | -                                      | -                                    | -                                         | Low                                   |
| Erler Zimmer [12]                           | ECMO Trainer Professional MK2 | C+P                                   | +                                      | +                                    | +                                         | High                                  |
| Health Care Engineering Systems Center [13] | ECMO Training Simulator       | C+P                                   | +/-                                    | -                                    | +/-                                       | Mid                                   |
| Lansdowne, <i>et al.</i> [14]               | Orpheus perfusion simulator   | C                                     | +/-                                    | N/A                                  | +/-                                       | Mid                                   |

|                                    |                                    |     |     |     |     |      |
|------------------------------------|------------------------------------|-----|-----|-----|-----|------|
| Mahmoud, <i>et al.</i> [15]        | Cannulation simulator              | C+P | +/- | -   | -   | Low  |
| Medical Simulator [16]             | Hybrids Vita                       | C+P | +/- | N/A | +/- | Mid  |
| MSE [17]                           | Adult ECMO Simulator               | C   | +   | N/A | +/- | Mid  |
| Palmer, <i>et al.</i> [18]         | Surgical model                     | P   | -   | +/- | -   | Low  |
| Palmer, <i>et al.</i> [19]         | Percutaneous model                 | P   | -   | +/- | +/- | Mid  |
| Puslecki, <i>et al.</i> [20]       | ECMO therapy simulator             | C+P | +   | -   | +/- | Mid  |
| PVLoops [21]                       | Harvi ECMO                         | C   | +   | N/A | -   | Mid  |
| Telehealth Research Institute [22] | ECMOjo                             | C   | +/- | N/A | -   | Low  |
| Texas Children's Hospital [23]     | RediStick ECMO Cannulation Trainer | P   | +/- | +   | +   | High |
| The Simulator Company [24]         | E-Sim Pro                          | C+P | +   | +   | +   | High |
| Thompson, <i>et al.</i> [25]       | ECMO Initiation Simulator          | P   | -   | -   | +/- | Low  |
| Zanella, <i>et al.</i> [26]        | Mathematical ECMO model            | C   | +   | N/A | -   | Mid  |

## References

1. 3-Dmed. ECMO Simulation Kit. Available online: <https://www.3-dmed.com/wp-content/uploads/2019/05/ECMO-Simulation-Kit.pdf> (accessed on 10 October 2022).
2. Allan, C.K.; Pigula, F.; Bacha, E.A.; Emani, S.; Fynn-Thompson, F.; Thiagarajan, R.R.; Imprescia, A.; Hayes, G.; Weinstock, P. An extracorporeal membrane oxygenation cannulation curriculum featuring a novel integrated skills trainer leads to improved performance among pediatric cardiac surgery trainees. *Simul Healthc* **2013**, *8*, 221-228, doi:10.1097/SIH.0b013e31828b4179.
3. Alhomsy, Y.; Alsalemi, A.; Noorizadeh, M.; Bensaali, F.; Meskin, N.; Hssain, A.A. A Modular Approach for a Patient Unit for Extracorporeal Membrane Oxygenation Simulator. *Membranes* **2021**, *11*, 424, doi:10.3390/membranes11060424.
4. Califia Patient Simulator. Available online: <https://www.biomedsimulation.com/califia-3-0/> (accessed on 11 October 2022).
5. Califia Lung Simulator. Available online: <https://www.biomedsimulation.com/califia-lung/> (accessed on 11 October 2022).
6. Broman, M.; Frenckner, B.; Bjällmark, A.; Broomé, M. Recirculation during Venous-Extra-Corporeal Membrane Oxygenation – a Simulation Study. *The International Journal of Artificial Organs* **2015**, *38*, 23-30, doi:10.5301/ijao.5000373.
7. Parallel Simulator. Available online: <https://www.chalicedmedical.com/products/parallel-simulator/> (accessed on 12 October 2022).
8. Colasanti, S.; Piemonte, V.; Devolder, E.; Zieliński, K.; Vandendriessche, K.; Meyns, B.; Fresiello, L. Development of a computational simulator of the extracorporeal membrane oxygenation and its validation with in vitro measurements. *Artificial Organs* **2021**, *45*, 399-410, doi:10.1111/aor.13842.

9. ECMO Trainer Evolution III. Available online: <https://www.crea-plast.com/en/45-ecmo-trainer> (accessed on 12 October 2022).
10. Eigenflow ECMO Simulator. Available online: <https://curtisliferesearch.com/eigenflow-ecmo-simulator/> (accessed on 10 October 2022).
11. Endo, T.; Kagaya, Y.; Arata, Y.; Imai, H. Long-term efficacy of an extracorporeal membrane oxygenation simulation with a novel, low-cost vascular model "Endo-Circuit". *Acute Medicine & Surgery* **2017**, *4*, 79-88, doi:10.1002/ams2.236.
12. ECMO Trainer Professional MK2. Available online: <https://erler-zimmer.de/shop/en/10953> (accessed on 31 October 2022).
13. ECMO Training Simulator. Available online: <https://healtheng.illinois.edu/about/researchareas/simulationeducation/ecmo> (accessed on 24 October 2022).
14. Lansdowne, W.; Machin, D.; Grant, D.J. Development of the Orpheus Perfusion Simulator for Use in High-fidelity Extracorporeal Membrane Oxygenation Simulation. *The Journal of ExtraCorporeal Technology* **2012**, *44*, 250-255.
15. Mahmoud, A.; Hssain, A.A.; Alinier, G.; Hassan, I.; Khurshid, U.; Abducarim, A.; Mahmud, S.; Abdallah, O.; Mohamed, E.; Alsalemi, A.; et al. Preliminary Implementation of the Next Generation Cannulation Simulator. 2019, 2019.
16. Hybrids Vita. Available online: <https://hybrids-vita.com/en.html> (accessed on 30 November 2022).
17. MSE ECMO simulator. Available online: <http://www.ecmosimulation.com/> (accessed on 17 December 2022).
18. Palmer, D.; Aspenleiter, M.; da Silva, J.; Castro-Medina, M.; Morell, V.; Sharma, M.; Viegas, M. A High-Fidelity Surgical Model and Perfusion Simulator Used to Demonstrate ECMO Cannulation, Initiation, and Stabilization. *The Journal of ExtraCorporeal Technology* **2019**, *51*, 6.
19. Palmer, D.; Aspenleiter, M.; da Silva, J.; Da Fonseca da Silva, L.; Medina-Castro, M.; Grayson, M.; Morell, V.; Palmer, A.; Sharma, M.; Stebler, J.; et al. A High-Fidelity Percutaneous Model Used to Demonstrate ECMO Cannulation. *The Journal of ExtraCorporeal Technology* **2021**, *53*, 208-213, doi:10.1182/ject-2100009.
20. Puslecki, M.; Ligowski, M.; Kiel, M.; Dabrowski, M.; Stefaniak, S.; Sip, M.; Maciejewski, A.; Dabrowska, A.; Kiel-Puslecka, I.; Klosiewicz, T.; et al. Prototype of extracorporeal membrane oxygenation (ECMO) therapy simulator used in regional ECMO program. *Journal of Thoracic Disease* **2018**, *10*, 5073-5079, doi:10.21037/jtd.2018.07.25.
21. Harvi ECMO. Available online: <https://harvi.online/site/welcome/harvi-ecmo/> (accessed on 12 October 2022).
22. ECMOjo Simulator. Available online: <https://ecmojo.sourceforge.net/> (accessed on 12 October 2022).
23. RediStik ECMO Cannulation Trainer. Available online: <https://www.youtube.com/watch?v=0wt5EHxH3CM> (accessed on 11 November 2022).
24. E-SIM Pro. Available online: <https://www.thesimulatorcompany.com/e-sim-pro> (accessed on 12 October 2022).
25. Thompson, J.L.; Grisham, L.M.; Scott, J.; Mogan, C.; Prescher, H.; Biffar, D.; Jarred, J.; Meyer, R.J.; Hamilton, A.J. Construction of a reusable, high-fidelity model to enhance extracorporeal membrane oxygenation training through simulation. *Adv Neonatal Care* **2014**, *14*, 103-109, doi:10.1097/ANC.0000000000000054.
26. Zanella, A.; Salerno, D.; Scaravilli, V.; Giani, M.; Castagna, L.; Magni, F.; Carlesso, E.; Cadringer, P.; Bombino, M.; Grasselli, G.; et al. A mathematical model of oxygenation during venovenous extracorporeal membrane oxygenation support. *J Crit Care* **2016**, *36*, 178-186, doi:10.1016/j.jcrc.2016.07.008.
