# Supplementary material for: Simulators and Simulations for Extracorporeal Membrane Oxygenation: An ECMO Scoping Review
Source: MDPI journal article supplement (doi:10.3390/jcm12051765), 2023-02-22
Supplement: s1 [file s1]

**Table S3.** Component fidelity (right column) is established by counting the total ECMO process components (diagnostics, circuit priming, circuit monitoring, cannulation, gas exchange, hemodynamics, weaning, decannulation, and (clinical) scenarios). The components are included computationally (C), physically (P), or computationally and physically (C+P). A total score out of these 10 possible components determined the classification is low-, mid-, or high-fidelity. Low-fidelity was assigned to ECMO sims when the total ECMO components were  $\leq 3$ , mid-fidelity was assigned when the total ECMO components was 4 to 7, while high fidelity was assigned when the total amount of ECMO components were  $\geq 8$ .

| Source                                                   | Device                                | Diagnostics<br>(C, P, C+P) | Circuit priming<br>(C, P, C+P) | Circuit monitoring<br>(C, P, C+P) | Cannulation<br>(C, P, C+P) | Connection<br>ECMO /<br>oxygenator<br>(C, P, C+P) | Gas exchange<br>(C, P, C+P) | Hemodynam-<br>ics<br>(C, P, C+P) | Weaning<br>(C, P, C+P) | Decannula-<br>tion<br>(C, P, C+P) | (Clinical)<br>scenarios<br>(C, P, C+P) | Total ECMO<br>process<br>components | Component<br>fidelity<br>(Low-Mid-<br>High) |
|----------------------------------------------------------|---------------------------------------|----------------------------|--------------------------------|-----------------------------------|----------------------------|---------------------------------------------------|-----------------------------|----------------------------------|------------------------|-----------------------------------|----------------------------------------|-------------------------------------|---------------------------------------------|
| 3-Dmed [1]                                               | ECMO Simu-<br>lation Kit              | N/A                        | N/A                            | N/A                               | P                          | N/A                                               | N/A                         | N/A                              | N/A                    | N/A                               | N/A                                    | 1/10                                | Low                                         |
| Allan, <i>et al.</i> [2]                                 | Integrated<br>Skills Trainer          | N/A                        | N/A                            | N/A                               | P                          | P                                                 | N/A                         | P                                | N/A                    | N/A                               | N/A                                    | 3/10                                | Low                                         |
| Alhomsj, <i>et al.</i><br>[3]                            | Modular<br>ECMO simu-<br>lator        | C+P                        | N/A                            | P                                 | N/A                        | P                                                 | P                           | P                                | N/A                    | N/A                               | C+P                                    | 6/10                                | Mid                                         |
| BioMed<br>Simulations [4]                                | Califia Patient<br>Simulator          | C                          | N/A                            | P                                 | N/A                        | P                                                 | N/A                         | C                                | N/A                    | N/A                               | C                                      | 5/10                                | Mid                                         |
| BioMed<br>Simulations [5]                                | Califia Lung<br>Simulator             | C                          | N/A                            | P                                 | N/A                        | P                                                 | C                           | C                                | N/A                    | N/A                               | C                                      | 6/10                                | Mid                                         |
| Broman, <i>et al.</i><br>[6]                             | Aplysia                               | N/A                        | N/A                            | C                                 | C                          | N/A                                               | C                           | C                                | N/A                    | N/A                               | C                                      | 5/10                                | Mid                                         |
| Chalice [7]                                              | Parallel Simu-<br>lator               | C                          | N/A                            | C+P                               | N/A                        | P                                                 | C                           | C                                | N/A                    | N/A                               | C                                      | 6/10                                | Mid                                         |
| Colasanti, <i>et al.</i><br>[8]                          | Computa-<br>tional ECMO<br>Simulator  | C                          | N/A                            | C                                 | N/A                        | N/A                                               | N/A                         | C                                | N/A                    | N/A                               | C                                      | 4/10                                | Mid                                         |
| Creaplast [9]                                            | ECMO Trainer<br>Evolution III         | N/A                        | N/A                            | N/A                               | P                          | N/A                                               | N/A                         | P                                | N/A                    | N/A                               | P                                      | 3/10                                | Low                                         |
| Curtis Life Re-<br>search [10]                           | Eigenflow 2<br>ADVANCED               | C                          | N/A                            | C                                 | P                          | N/A                                               | C                           | C                                | N/A                    | N/A                               | C+P                                    | 6/10                                | Mid                                         |
| Endo, <i>et al.</i> [11]                                 | Endo Circuit                          | N/A                        | N/A                            | N/A                               | P                          | N/A                                               | N/A                         | N/A                              | N/A                    | N/A                               | N/A                                    | 1/10                                | Low                                         |
| Erler Zimmer<br>[12]                                     | ECMO Trainer<br>Professional<br>MK2   | N/A                        | N/A                            | N/A                               | P                          | P                                                 | N/A                         | P                                | N/A                    | P                                 | C+P                                    | 6/10                                | Mid                                         |
| Health Care En-<br>gineering Sys-<br>tems Center<br>[13] | ECMO Train-<br>ing Simulator          | N/A                        | N/A                            | N/A                               | P                          | N/A                                               | P                           | P                                | N/A                    | N/A                               | C+P                                    | 4/10                                | Mid                                         |
| Lansdowne, <i>et al.</i> [14]                            | Orpheus per-<br>fusion simula-<br>tor | C+P                        | N/A                            | C+P                               | N/A                        | P                                                 | N/A                         | C+P                              | N/A                    | N/A                               | C+P                                    | 5/10                                | Mid                                         |

|                                    |                                    |     |     |     |     |     |     |     |     |     |     |     |      |     |
|------------------------------------|------------------------------------|-----|-----|-----|-----|-----|-----|-----|-----|-----|-----|-----|------|-----|
| Mahmoud, <i>et al.</i> [15]        | Cannulation simulator              | N/A | N/A | N/A | C+P | P   | N/A | N/A | N/A | N/A | N/A | C+P | 3/10 | Low |
| Medical Simulator [16]             | Hybrids Vita                       | N/A | N/A | C+P | C   | P   | C+P | C+P | N/A | N/A | N/A | C+P | 6/10 | Mid |
| MSE [17]                           | Adult ECMO Simulator               | C   | N/A | C   | N/A | N/A | C   | C   | N/A | N/A | N/A | C   | 5/10 | Mid |
| Palmer, <i>et al.</i> [18]         | Surgical model                     | N/A | N/A | N/A | P   | P   | N/A | N/A | N/A | N/A | N/A | N/A | 2/10 | Low |
| Palmer, <i>et al.</i> [19]         | Percutaneous model                 | N/A | N/A | N/A | P   | P   | N/A | N/A | N/A | N/A | N/A | N/A | 2/10 | Low |
| Puslecki, <i>et al.</i> [20]       | ECMO therapy simulator             | C+P | N/A | P   | P   | P   | N/A | C   | N/A | N/A | C+P | C+P | 7/10 | Mid |
| PVLoops [21]                       | Harvi ECMO                         | C   | N/A | C   | C   | N/A | C   | C   | N/A | N/A | N/A | C   | 6/10 | Mid |
| Telehealth Research Institute [22] | ECMOjo                             | C   | N/A | C   | N/A | N/A | C   | C   | N/A | N/A | N/A | C   | 6/10 | Mid |
| Texas Children's Hospital [23]     | RediStick ECMO Cannulation Trainer | N/A | P   | N/A | P   | P   | N/A | N/A | N/A | N/A | N/A | N/A | 3/10 | Low |
| The Simulator Company [24]         | E-Sim Pro                          | N/A | N/A | N/A | P   | P   | N/A | C   | N/A | N/A | N/A | C   | 4/10 | Mid |
| Thompson, <i>et al.</i> [25]       | ECMO Initiation Simulator          | N/A | N/A | N/A | P   | P   | N/A | N/A | N/A | N/A | C   | N/A | 2/10 | Low |
| Zanella, <i>et al.</i> [26]        | Mathematical ECMO model            | C   | N/A | C   | N/A | N/A | C   | C   | N/A | N/A | N/A | C   | 5/10 | Mid |

## References

- 3-Dmed. ECMO Simulation Kit. Available online: (accessed on 10 October 2022).
- Allan, C.K.; Pigula, F.; Bacha, E.A.; Emani, S.; Fynn-Thompson, F.; Thiagarajan, R.R.; Imprescia, A.; Hayes, G.; Weinstock, P. An extracorporeal membrane oxygenation cannulation curriculum featuring a novel integrated skills trainer leads to improved performance among pediatric cardiac surgery trainees. *Simul Healthc* **2013**, *8*, 221-228, doi:10.1097/SIH.0b013e31828b4179.
- Alhomsy, Y.; Alsalemi, A.; Noorizadeh, M.; Bensaali, F.; Meskin, N.; Hssain, A.A. A Modular Approach for a Patient Unit for Extracorporeal Membrane Oxygenation Simulator. *Membranes* **2021**, *11*, 424, doi:10.3390/membranes11060424.
- Califia Patient Simulator. (accessed on 11 October 2022).
- Califia Lung Simulator. Available online: (accessed on 11 October 2022).
- Broman, M.; Frenckner, B.; Bjällmark, A.; Broomé, M. Recirculation during Venous-Extra-Corporeal Membrane Oxygenation – a Simulation Study. *The International Journal of Artificial Organs* **2015**, *38*, 23-30, doi:10.5301/ijao.5000373.
- Parallel Simulator. (accessed on 12 October 2022).
- Colasanti, S.; Piemonte, V.; Devolder, E.; Zieliński, K.; Vandendriessche, K.; Meyns, B.; Fresiello, L. Development of a computational simulator of the extracorporeal membrane oxygenation and its validation with in vitro measurements. *Artificial Organs* **2021**, *45*, 399-410, doi:10.1111/aor.13842.
- ECMO Trainer Evolution III. (accessed on 12 October 2022).
- Eigenflow ECMO Simulator. Available online: (accessed on 10 October 2022).
- Endo, T.; Kagaya, Y.; Arata, Y.; Imai, H. Long-term efficacy of an extracorporeal membrane oxygenation simulation with a novel, low-cost vascular model “Endo-Circuit”. *Acute Medicine & Surgery* **2017**, *4*, 79-88, doi:10.1002/ams2.236.
- ECMO Trainer Professional MK2. (accessed on 31 October 2022).
- ECMO Training Simulator. Available online: (accessed on 24 October 2022).
- Lansdowne, W.; Machin, D.; Grant, D.J. Development of the Orpheus Perfusion Simulator for Use in High-fidelity Extracorporeal Membrane Oxygenation Simulation. *The Journal of ExtraCorporeal Technology* **2012**, *44*, 250-255.
- Mahmoud, A.; Hssain, A.A.; Alinier, G.; Hassan, I.; Khurshid, U.; Abducarim, A.; Mahmud, S.; Abdallah, O.; Mohamed, E.; Alsalemi, A.; et al. Preliminary Implementation of the Next Generation Cannulation Simulator. 2019, 2019.
- Hybrids Vita. (accessed on 30 November 2022).

17. MSE ECMO simulator. Available online: (accessed on 17 December 2022).
18. Palmer, D.; Aspenleiter, M.; da Silva, J.; Castro-Medina, M.; Morell, V.; Sharma, M.; Viegas, M. A High-Fidelity Surgical Model and Perfusion Simulator Used to Demonstrate ECMO Cannulation, Initiation, and Stabilization. *The Journal of ExtraCorporeal Technology* **2019**, *51*, 6.
19. Palmer, D.; Aspenleiter, M.; da Silva, J.; Da Fonseca da Silva, L.; Medina-Castro, M.; Grayson, M.; Morell, V.; Palmer, A.; Sharma, M.; Stebler, J.; et al. A High-Fidelity Percutaneous Model Used to Demonstrate ECMO Cannulation. *The Journal of ExtraCorporeal Technology* **2021**, *53*, 208-213, doi:10.1182/ject-2100009.
20. Puslecki, M.; Ligowski, M.; Kiel, M.; Dabrowski, M.; Stefaniak, S.; Sip, M.; Maciejewski, A.; Dabrowska, A.; Kiel-Puslecka, I.; Kłosiewicz, T.; et al. Prototype of extracorporeal membrane oxygenation (ECMO) therapy simulator used in regional ECMO program. *Journal of Thoracic Disease* **2018**, *10*, 5073-5079, doi:10.21037/jtd.2018.07.25.
21. Harvi ECMO. (accessed on 12 October 2022).  
Available online: (accessed on 12 October 2022).
25. Thompson, J.L.; Grisham, L.M.; Scott, J.; Mogan, C.; Prescher, H.; Biffar, D.; Jarred, J.; Meyer, R.J.; Hamilton, A.J. Construction of a reusable, high-fidelity model to enhance extracorporeal membrane oxygenation training through simulation. *Adv Neonatal Care* **2014**, *14*, 103-109, doi:10.1097/ANC.000000000000054.
26. Zanella, A.; Salerno, D.; Scaravilli, V.; Giani, M.; Castagna, L.; Magni, F.; Carlesso, E.; Cadringer, P.; Bombino, M.; Grasselli, G.; et al. A mathematical model of oxygenation during venovenous extracorporeal membrane oxygenation support. *J Crit Care* **2016**, *36*, 178-186, doi:10.1016/j.jcrc.2016.07.008.
