# Supplementary material for: Simulators and Simulations for Extracorporeal Membrane Oxygenation: An ECMO Scoping Review
Source: J Clin Med. 2023 Feb 22;12(5):1765. doi: 10.3390/jcm12051765 (PMC10003420; doi:10.3390/jcm12051765)
Supplement: Supplementary file 1 [file jcm-12-01765-s001.zip]

Archive with 5 entries (5 files):
- Figures S1 Graphical Summary of ECMO sims.pdf
- Table S1 Desk Research.pdf
- Table S2 Definition-Based Fidelity.pdf
- Table S3 Component Fidelity.pdf
- Table S4 Customization Fidelity.pdf
